# Supplementary material for: The introduction of a perovskite seed layer for high performance perovskite solar cells
Source: Royal Society of Chemistry journal article supplement (doi:10.1039/c8ta07617k), 2018-01-01
Supplement: c8ta07617k1.pdf [file c8ta07617k1.pdf]

## Supporting Information

### The introduction of perovskite seed layer for high performance perovskite solar cells

Jaeki Jeong<sup>a</sup>, Hak-Beom Kim<sup>a</sup>, Yung Jin Yoon<sup>a</sup>, Na Gyeong An<sup>a</sup>, Seyeong Song<sup>a</sup>, Jae Won Kim<sup>a</sup>, Minjin Kim<sup>b</sup>, Hyungsu Jang<sup>a</sup>, Dong Suk Kim<sup>b,\*</sup>, Gi-Hwan Kim<sup>a,\*</sup> and Jin Young Kim<sup>a,\*</sup>

<sup>a</sup> Perovtronic Research Center and Department of Energy Engineering, Ulsan National Institute of Science and Technology (UNIST), Ulsan 44919, South Korea.

E-mail: [ghkim@unist.ac.kr](mailto:ghkim@unist.ac.kr), [jykim@unist.ac.kr](mailto:jykim@unist.ac.kr)

<sup>b</sup> Korea KIER-UNIST Advanced Center for Energy, Korea Institute of Energy Research (KIER), Ulsan 44919, South Korea.

E-mail: [kimds@kier.re.kr](mailto:kimds@kier.re.kr)

#### AUTHOR INFORMATION

##### Corresponding Author

<sup>a,\*</sup>E-mail: [ghkim@unist.ac.kr](mailto:ghkim@unist.ac.kr), [jykim@unist.ac.kr](mailto:jykim@unist.ac.kr) ; Fax: +82-52-217-2909; Tel: +82- 52-217-2911

<sup>b,\*</sup>E-mail: [kimds@kier.re.kr](mailto:kimds@kier.re.kr); Fax+82-52-217-2579; Tel: +82- 52-217-2942

This supporting information presents the following contents.

**Supporting Tables S1**

**Supporting Figures S1-S7**

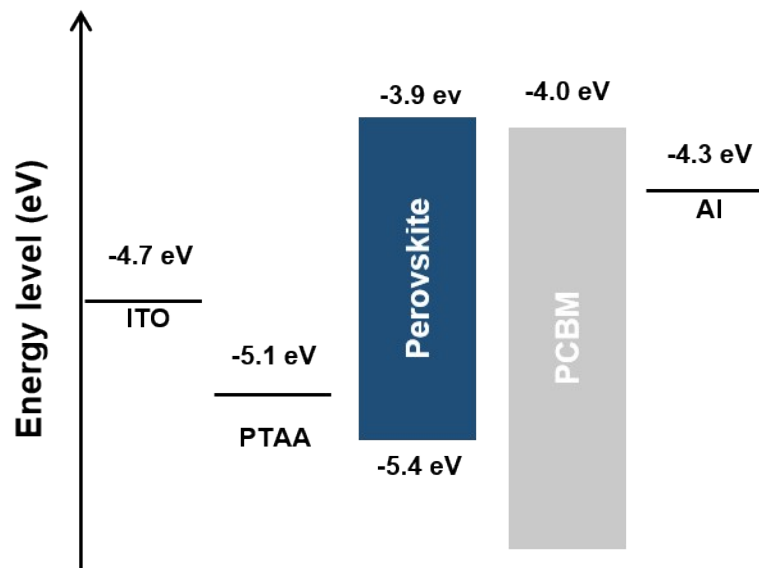

**Figure S1.** Energy band diagram of perovskite solar cells.

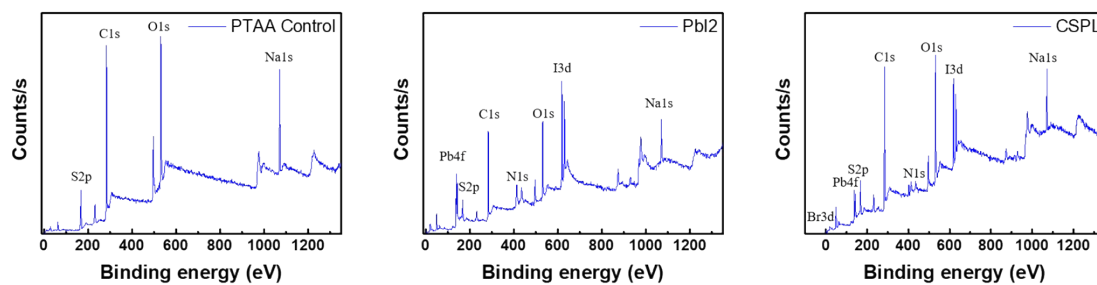

**Figure S2.** XPS survey spectrum of PTAA control, PbI<sub>2</sub> seed layer and CSPL films after washing by DMF solvent.

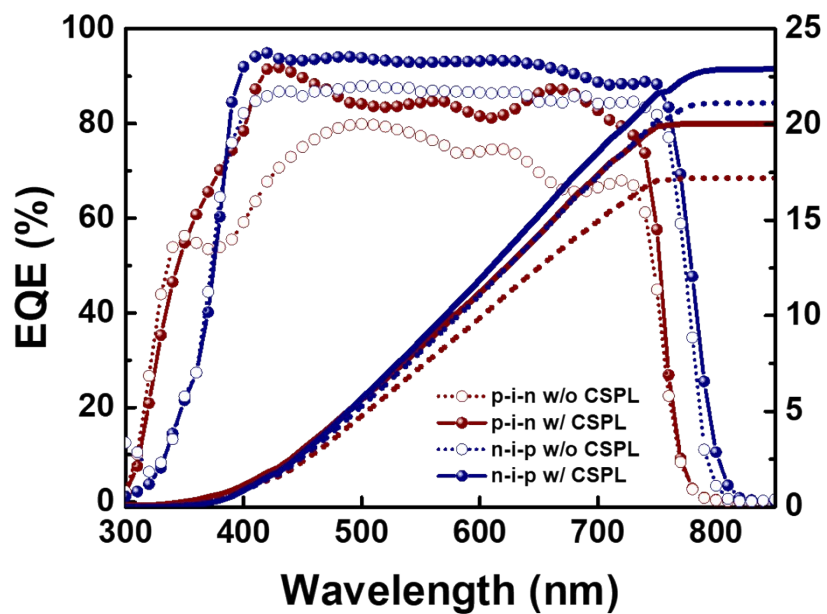

**Figure S3.** EQE and calculated  $J_{sc}$  of p-i-n structure and n-i-p structure of CSPL perovskite solar cells. (p-i-n w/o CSPL:  $17.25 J_{sc}(\text{mAcm}^{-2})$ , p-i-n w/ CSPL:  $20.05 J_{sc}(\text{mAcm}^{-2})$ , n-i-p w/o CSPL:  $21.13 J_{sc}(\text{mAcm}^{-2})$ , n-i-p w/ CSPL:  $22.90 J_{sc}(\text{mAcm}^{-2})$ )

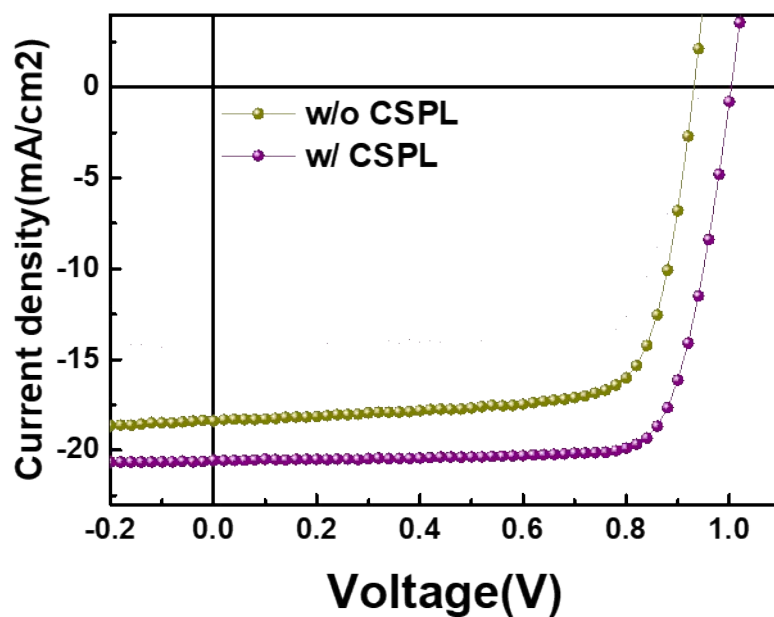

**Figure S4.** *J-V* characteristics of perovskite solar cells without and with CSPL based on PEDOT:PSS HTL.

**Table S1.** Solar cells characteristic of p-i-n structure perovskite devices without and with and without CSPL based on PEDOT:PSS HTL.

|          | $J_{sc}$ (mA cm <sup>-2</sup> ) | $V_{oc}$ (V) | <i>FF</i> | <i>PCE</i> (%) |
|----------|---------------------------------|--------------|-----------|----------------|
| w/o S.L. | 18.39                           | 0.93         | 0.75      | 12.81          |
| w/ S.L.  | 20.09                           | 1.00         | 0.79      | 16.25          |

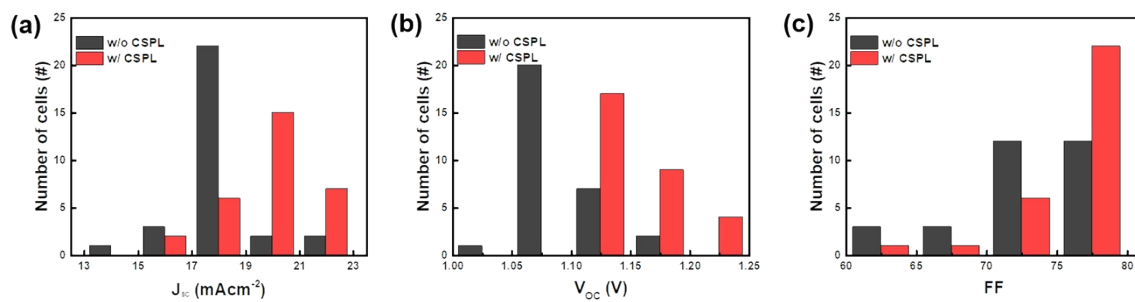

**Figure S5.** Histogram of device statistics from a total of 30 p-i-n structure solar cell devices (ITO/PTAA/seed layer/MAPbBr<sub>x</sub>I<sub>3-x</sub>/PC<sub>61</sub>BM/Al) comprising without and with CSPL. (a) Short circuit current density, (b) open circuit voltage, (c) fill factor.

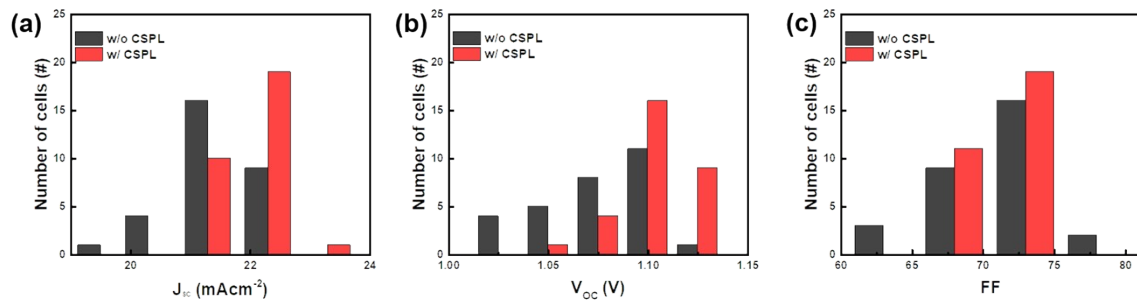

**Figure S6.** Histogram of n-i-p device statistics from a total of 30 solar cell devices (FTO/bl-TiO<sub>2</sub>/Mesoporous TiO<sub>2</sub>+Perovskite((FAPbI<sub>3</sub>)<sub>0.85</sub>(MAPbBr<sub>3</sub>)<sub>0.15</sub>)/Spiro-MeOTAD/Au) comprising without and with CSPL. (a) Short circuit current density, (b) open circuit voltage, (c) fill factor

**5  $\mu\text{m}$  X 5  $\mu\text{m}$**

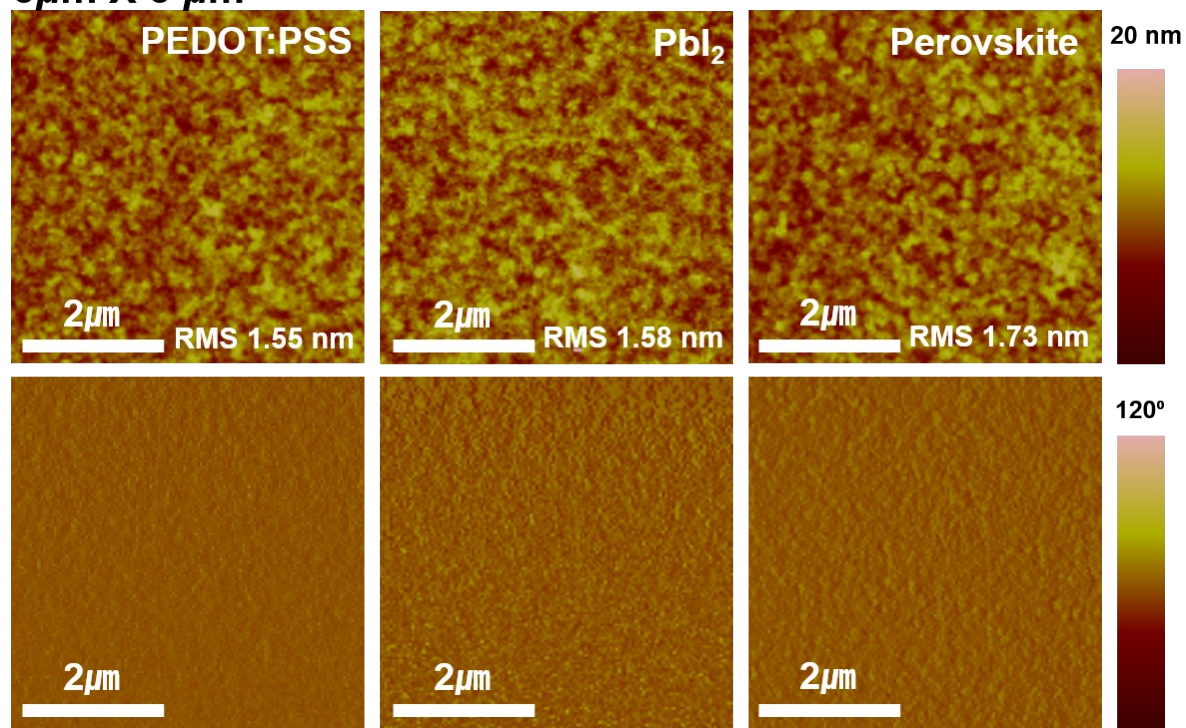

**Figure S7.** Atomic force microscope (AFM) surface image of PEDOT control substrate,  $\text{PbI}_2$ , CSPL films respectively, after washed by DMF solvent.



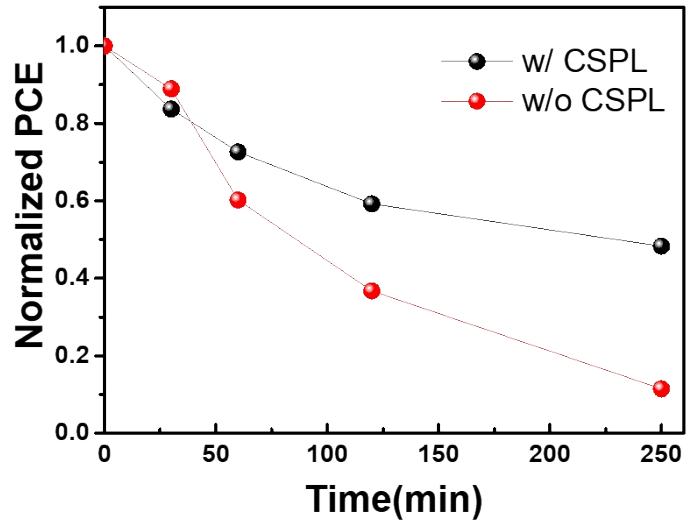

**Figure S8.** Stability test was performed for non-encapsulated cells (with and without CSPL PeSCs) under an air about 40% humidity condition.
